# Supplementary material for: Lycosin-II Exhibits Antifungal Activity and Inhibits Dual-Species Biofilm by Candida albicans and Staphylococcus aureus
Source: MDPI journal article supplement (doi:10.3390/jof8090901), 2022-08-24
Supplement: s1 [file jof-1831281-supplementary.pdf › jof-1831281-supplementary.pdf]

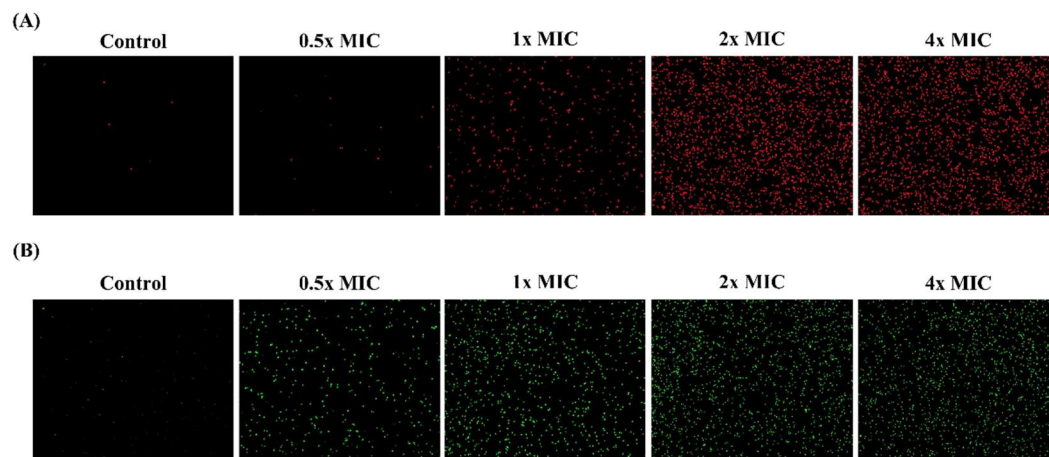

**Figure S1.** Fluorescence microscopy of *C. albicans* stained (A) PI and (B) SYTOX Green after treatment with Lycosin-II at 0.5x, 1x, 2x and 4x MIC. These images were obtained by using an EVOS FL Auto 2 imaging system. *C. albicans* without treatment was used as controls.
